# Supplementary material
Source: publisher figshare collection journal article supplement (https://karger.figshare.com/ndownloader/files/28660266)
Supplement: Supplementary file 1 [file 28660266]

**Supplementary Table 4. The relation between incidence of p53-RS and number of smoking in HCC group**

|  | p53-RS (n=102) | non-p53-RS (n=78) | *2* | *p* |
| --- | --- | --- | --- | --- |
| Number of smoking (%) |  | | | |
| <2 packs/day | 75 (73.53) | 51 (65.38) | 1.035 | 0.309 |
| ≥2 packs/day | 27 (26.47) | 27 (34.62) |
